# Supplementary material
Source: PubMed Central journal article supplement (PMC521956)

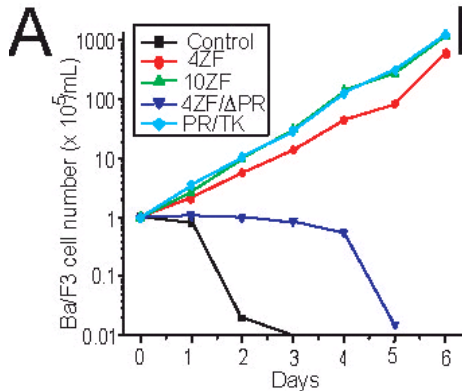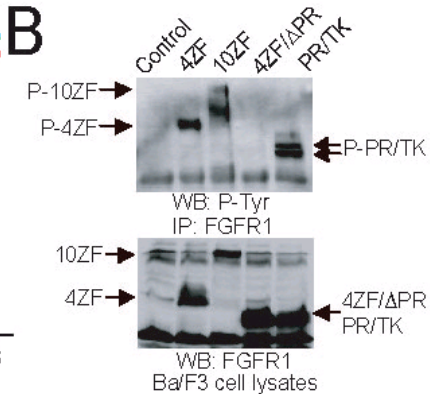

Supplement: pnas_101_40_14479__1.pdf [file pnas_101_40_14479__1.pdf]
